# Supplementary material for: Global Carbon Budget 2023
Source: Copernicus journal article supplement (doi:10.5194/essd-2023-409), 2023-10-11
Supplement: Supplementary file 1 [file essd-2023-409-supplement.zip]

Archive with 2 entries (2 files):
- Supplement.pdf
- Tracked changes document.pdf
